# Supplementary material for: A carbazole-based self-assembled monolayer as the hole transport layer for efficient and stable Cs0.25FA0.75Sn0.5Pb0.5I3solar cells
Source: Royal Society of Chemistry journal article supplement (doi:10.1039/d3ta01276j), 2023-01-01
Supplement: d3ta01276j1.pdf [file d3ta01276j1.pdf]

## Supporting Information

### **Carbazole Based Self-Assembled Monolayer as Hole Transport Layer for Efficient and stable $\text{Cs}_{0.25}\text{FA}_{0.75}\text{Sn}_{0.5}\text{Pb}_{0.5}\text{I}_3$ Solar Cells**

*Matteo Pitaro, Javier Sebastian Alonso, Lorenzo Di Mario, David G. Romero, Karolina Tran, Teodor Zaharia, Malin B. Johansson, Erik M. J. Johansson, and Maria Antonietta Loi\**

M. Pitaro, J. S. Alonso, Dr. L. Di Mario, D.G. Romero, K. Tran, Dr. T. Zaharia, Prof. Dr. M.A. Loi

Photophysics and OptoElectronics

Zernike Institute for Advanced Materials

University of Groningen

Nijenborgh 4, 9747 AG Groningen, The Netherlands

E-mail: m.a.loi@rug.nl

M. B. Johansson, E. M. J. Johansson

Department of Chemistry - Ångström Laboratory, Physical Chemistry

Uppsala University

Lägerhyddsvägen 1 75120 Uppsala, Sweden

## Supporting Figures

(a)

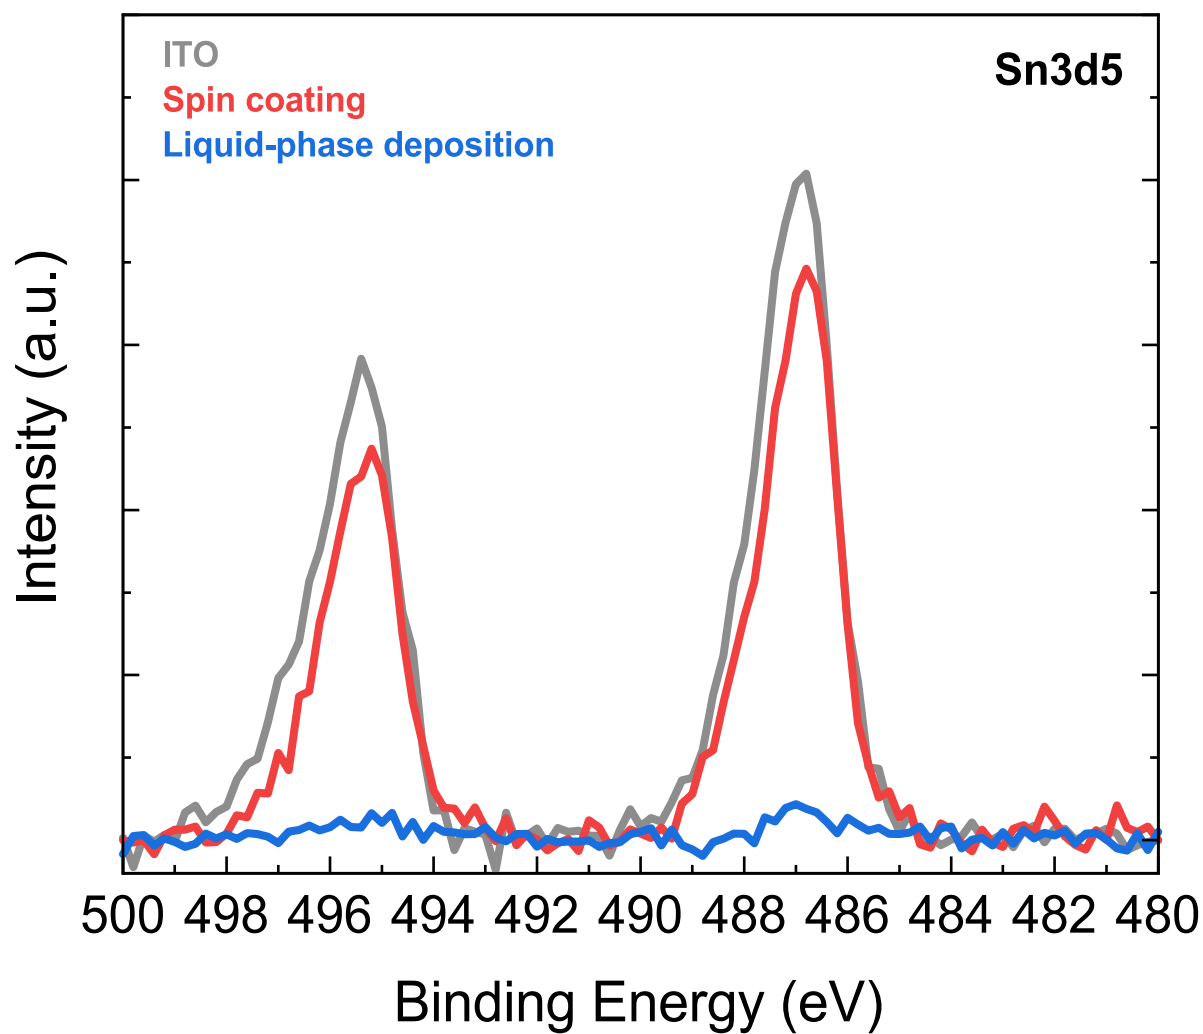

**Figure S1.** a) Sn3d X-ray photoelectron spectra for ITO (gray line), spin coated SAM (red line), and SAM deposited via liquid-phase deposition (blue line).

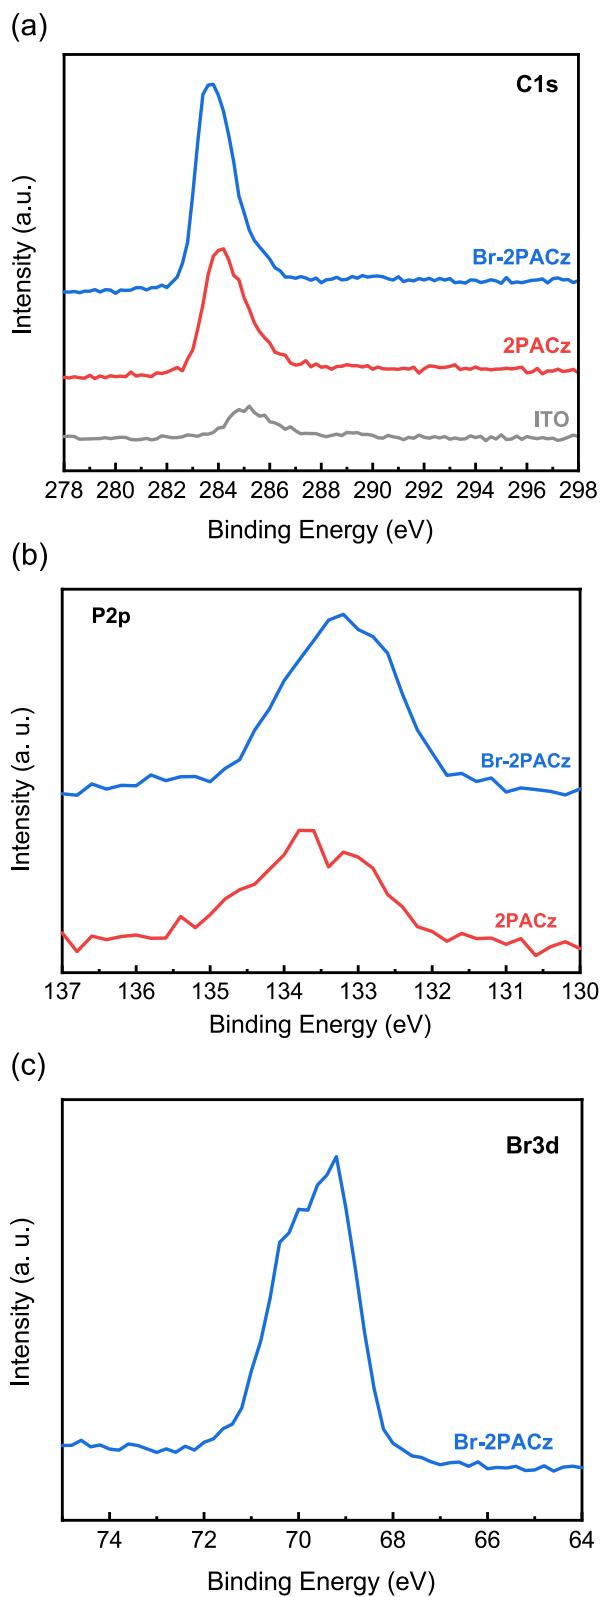

**Figure S2.** XPS spectra recorded for a) C 1s, b) P 2p, and c) Br 3d regions on ITO (gray line), ITO/2PACz (spin coated, red line), and ITO/Br-2PACz substrates (liquid-phase deposition, blue line).

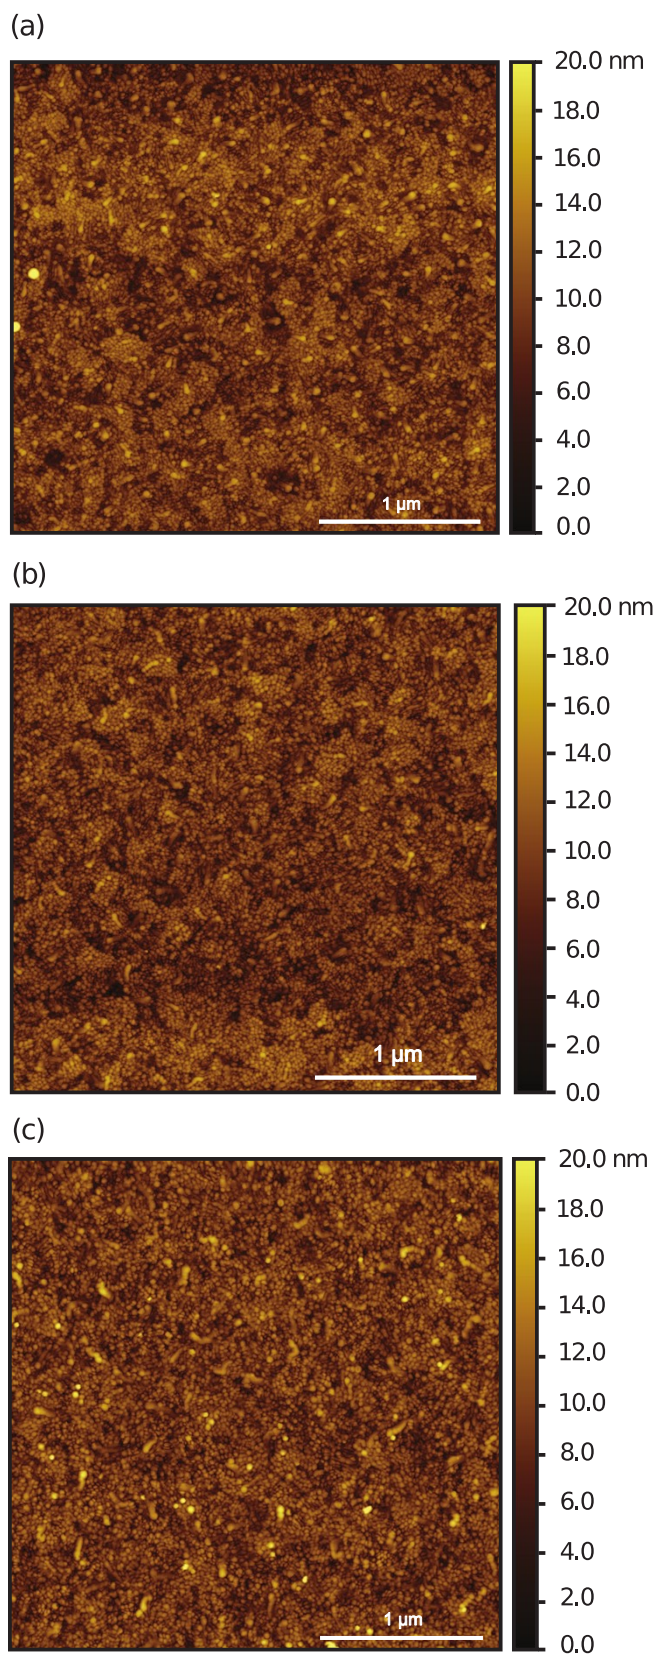

**Figure S3.** AFM images recorded on a) ITO, b) ITO/2PACz, and c) ITO/Br-2PACz substrates. All the SAMs used for the AFM measurements were deposited by liquid-phase deposition method.

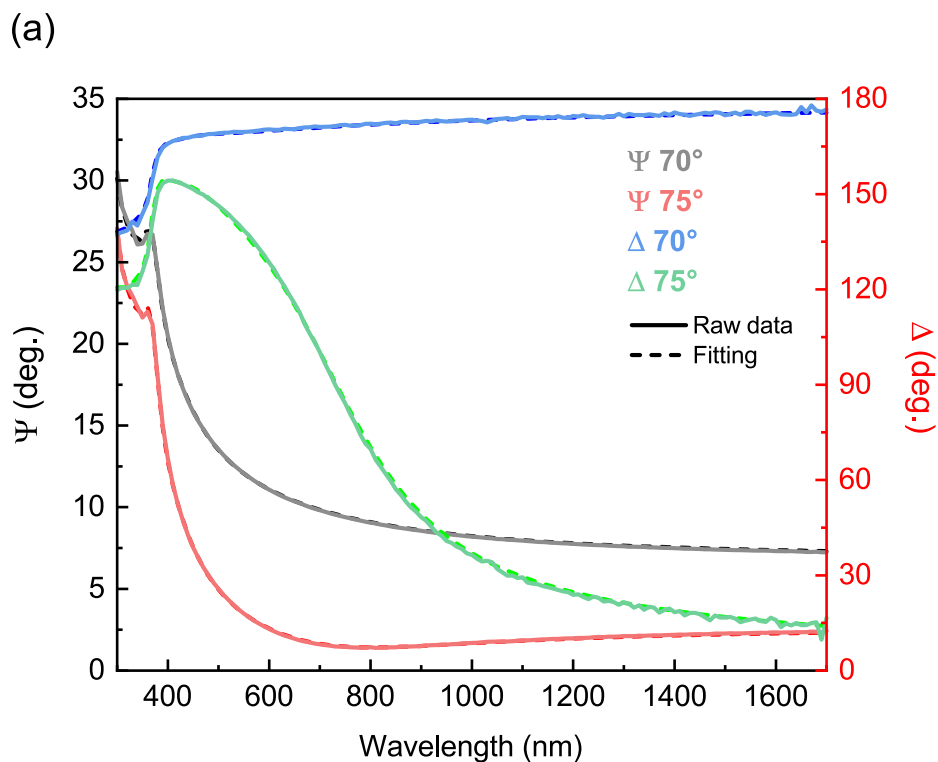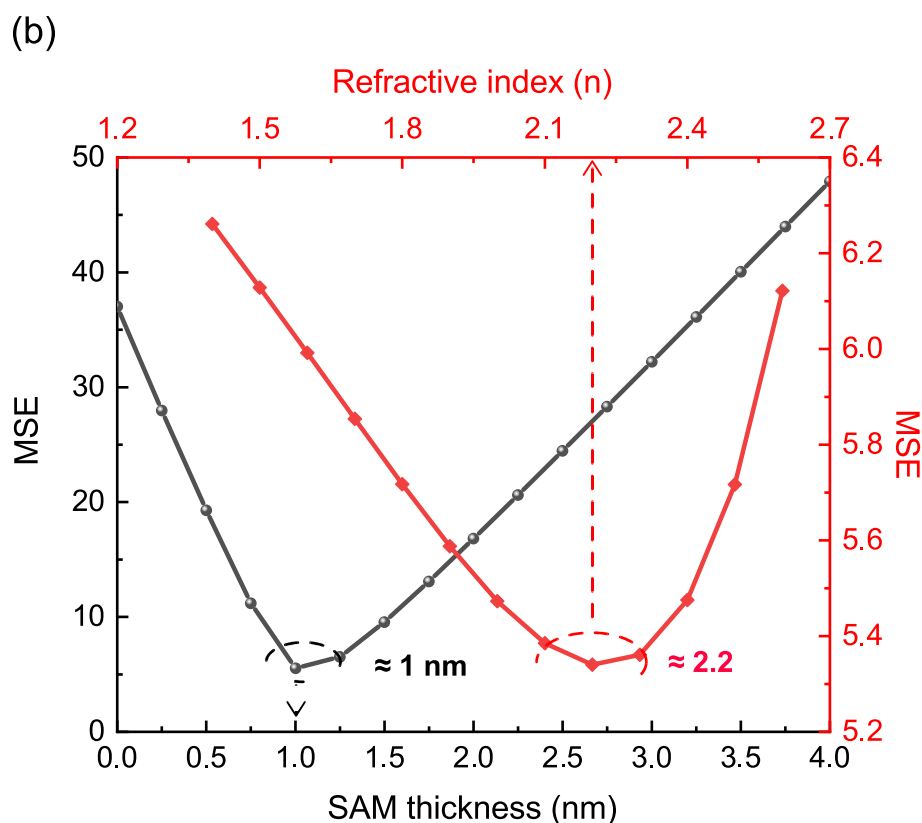

**Figure S4.** a) Experimental and fitting data of variable angle spectroscopic ellipsometry measurements. Black and red curves shows the Psi values for SiOx/Br-2PACz samples, while the blue and green curves represents the Delta values for SiOx/Br-2PACz samples. The measured angles are the 70° and 75°. (b) The Mean Squared Error (MSE) values for different SAM thickness (black curves) and different refractive index values (red curves).

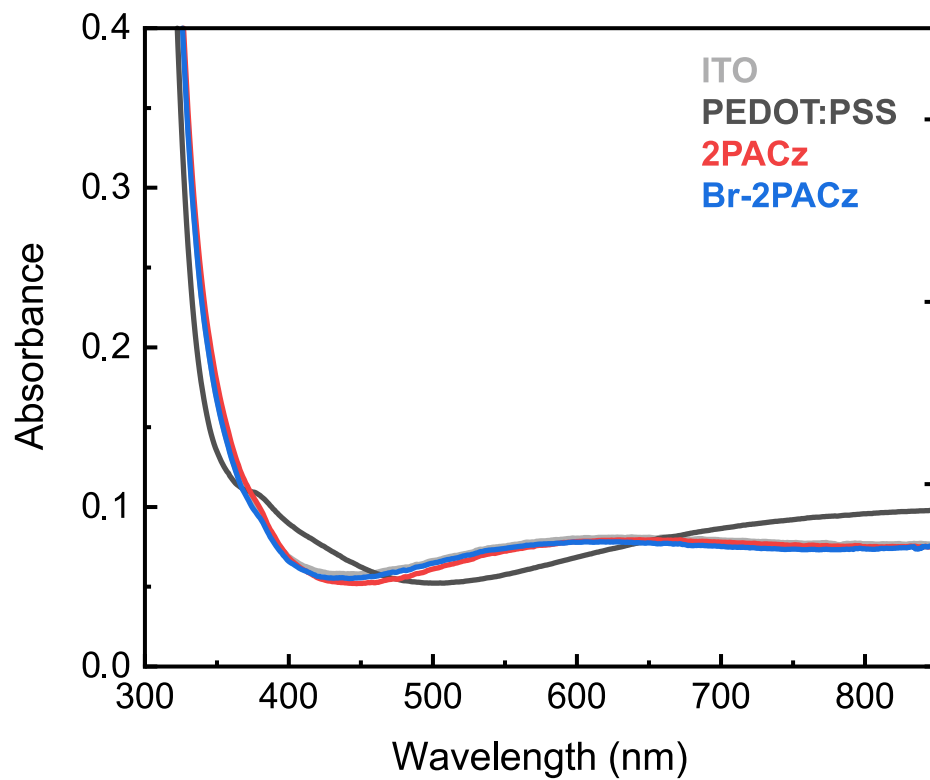

**Figure S5.** Absorbance spectra of PEDOT: PSS, 2PACz, and Br-2PACz coated on ITO compared to the ITO absorption spectrum.

(a)

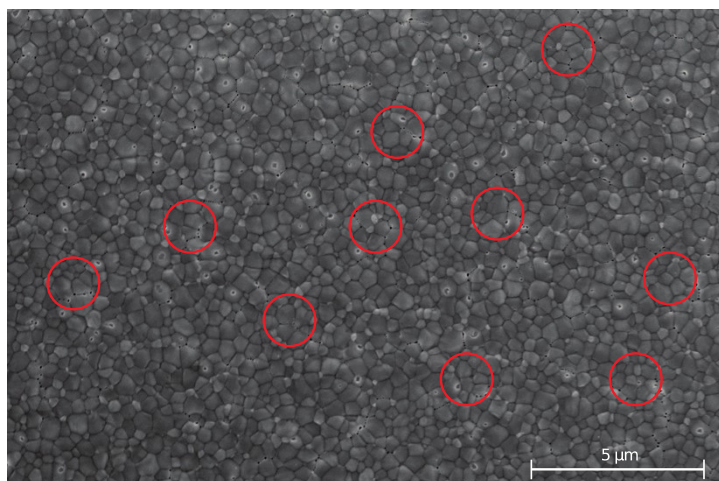

(b)

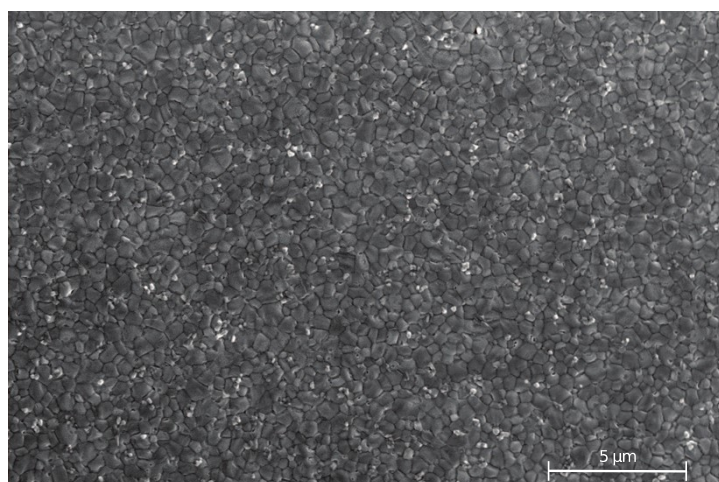

(c)

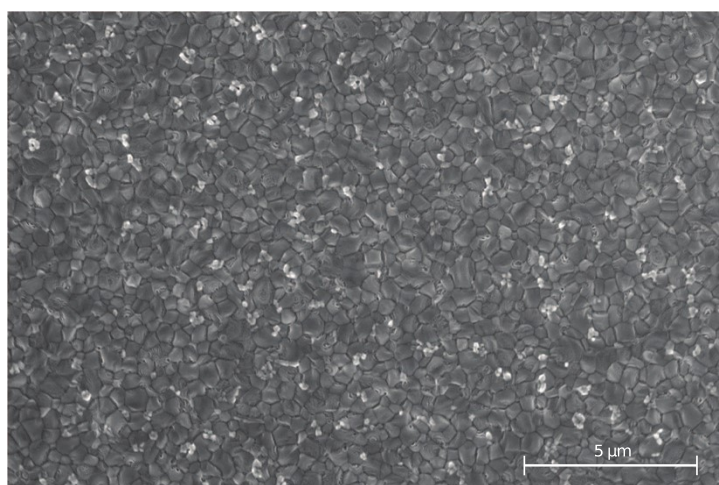

**Figure S6.** SEM images recorded on the perovskite surface deposited on a) PEDOT: PSS, b) 2PACz, and c) Br-2PACz. Red circles in a) panel highlights the presence of pinholes on the perovskite surface.



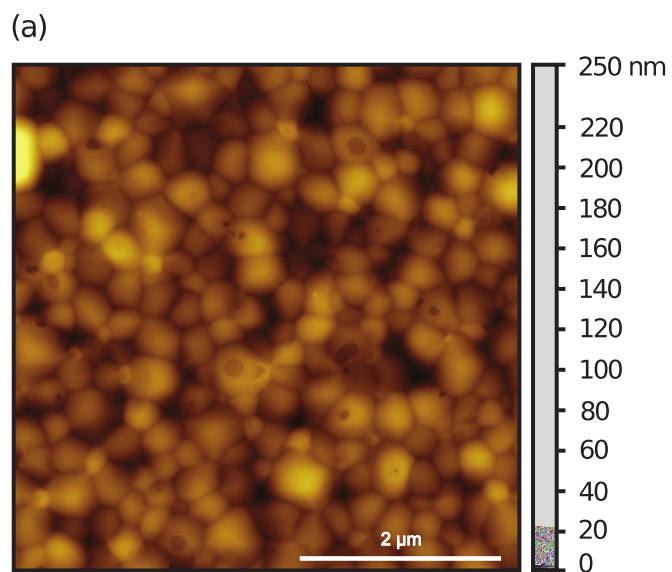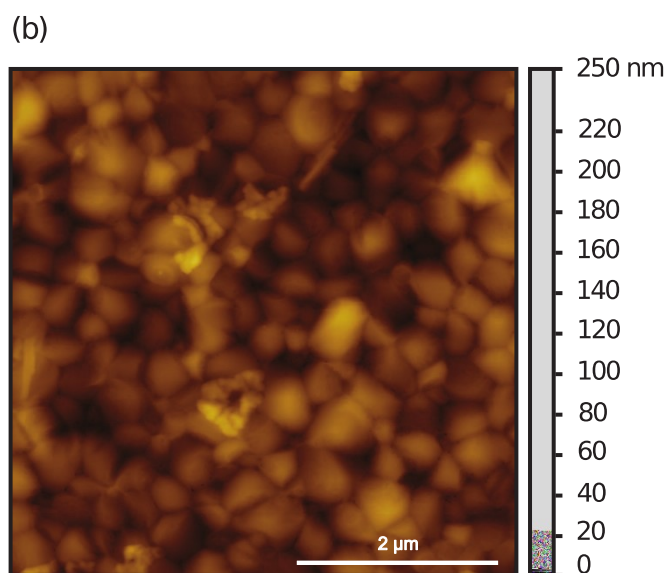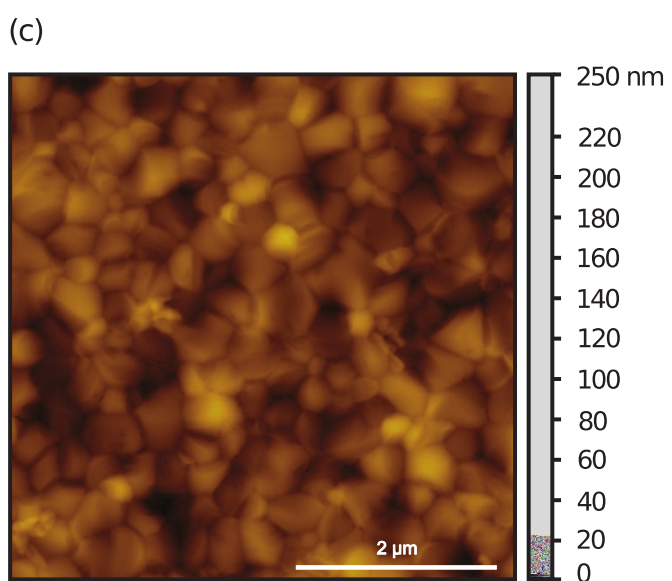

**Figure S7.** AFM height map for a) ITO/PEDOT/Perovskite, b) ITO/2PACz/Perovskite, and c) ITO/Br-2PACz/Perovskite.



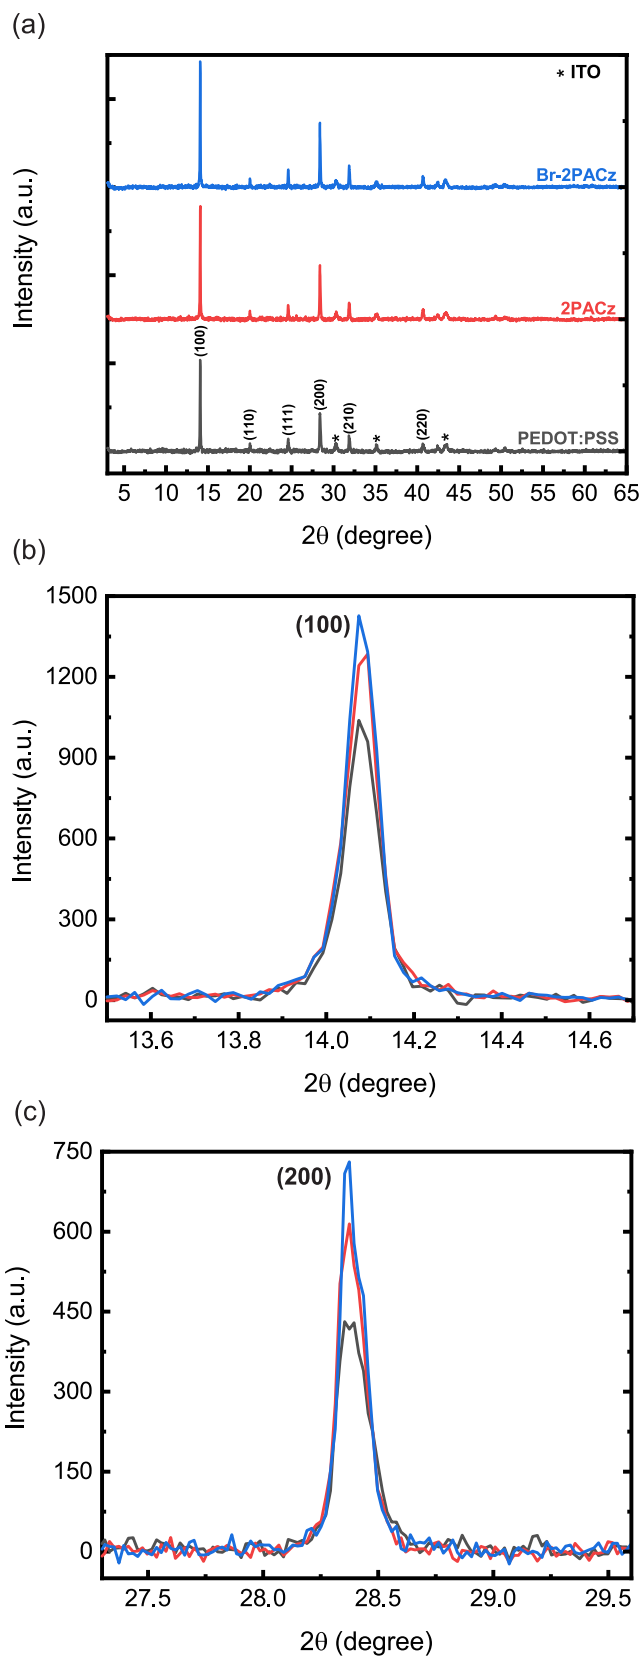

**Figure S8.** a) XRD patterns for the perovskite material deposited on the different HTLs. Magnification on the b) (100) and c) (200) peaks of the XRD perovskite spectra showed in Figure S8a.

**Table S1.** Peak position and Full-width half maximum (FWHM) for (100) peak, and the calculated crystallite size and d-spacing for the (100) plane.

|                  | <b>(100) peak position</b> | <b>FWHM</b> | <b>Crystallite size (nm)</b> | <b>d-spacing (Å)</b> |
|------------------|----------------------------|-------------|------------------------------|----------------------|
| <b>PEDOT:PSS</b> | 14.08008                   | 0.09944     | 79.23604                     | 6.28493              |
| <b>2PACz</b>     | 14.08045                   | 0.09558     | 82.43602                     | 6.28477              |
| <b>Br-2PACz</b>  | 14.08015                   | 0.08878     | 88.75008                     | 6.28490              |

**Table S2.** TRPL decay and average values obtained after fitting the curves showed in Figure 2h.

|                  | <b>&lt;<math>\tau</math>&gt; (ns)</b> | <b><math>\tau_1</math> (ns)</b> | <b><math>\tau_2</math> (ns)</b> |
|------------------|---------------------------------------|---------------------------------|---------------------------------|
| <b>PEDOT:PSS</b> | 44.65                                 | 21.67                           | 63.85                           |
| <b>Br-2PACz</b>  | 82.98                                 | 28.27                           | 85.11                           |
| <b>2PACz</b>     | 88.23                                 | 31.10                           | 119.00                          |

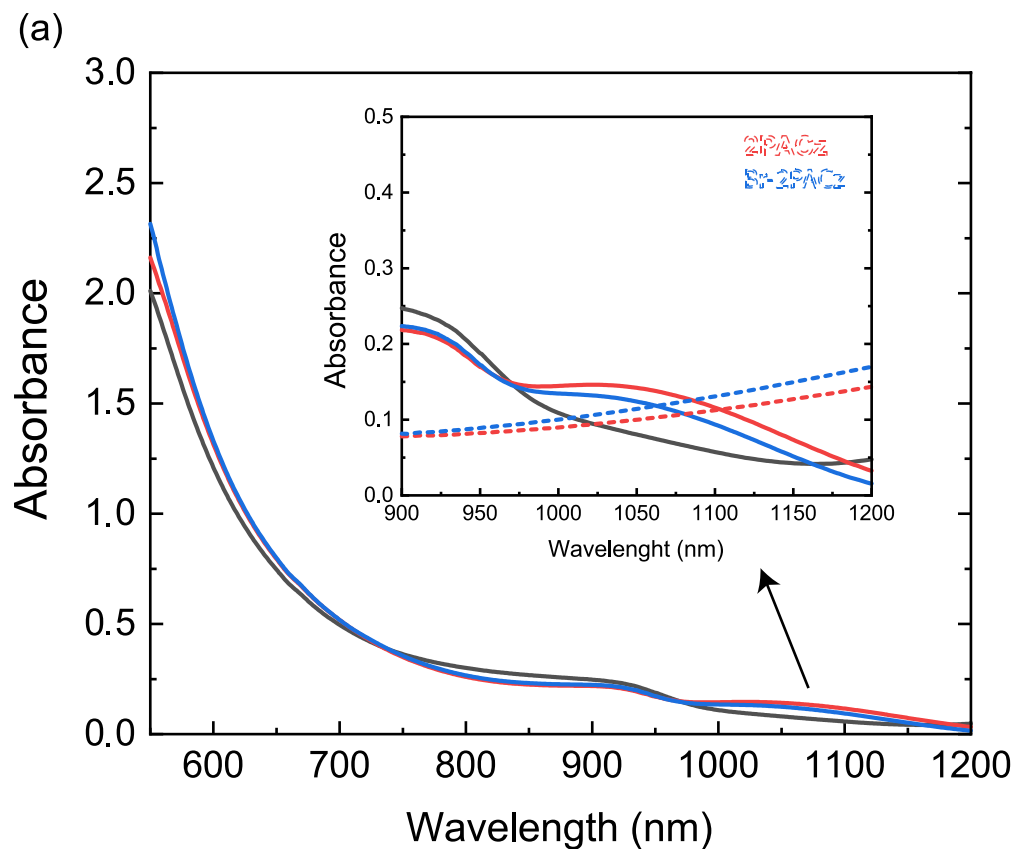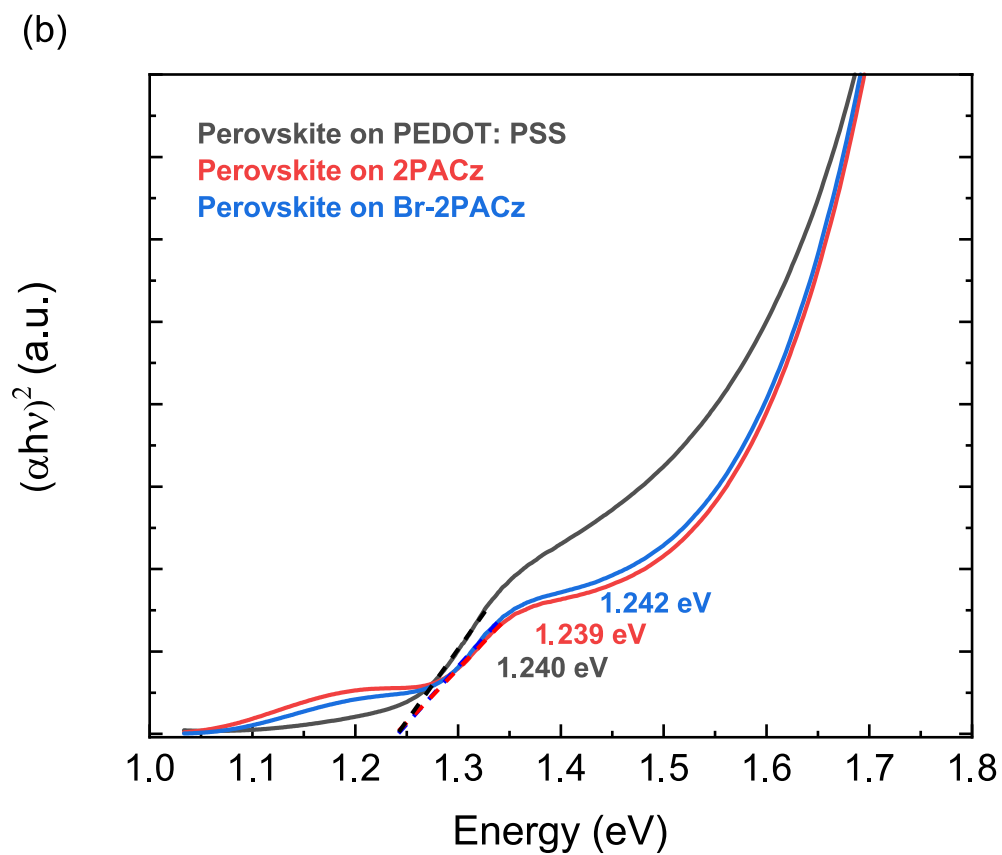

**Figure S9.** . a) Absorbance spectrum and b) Tauc plot for  $\text{Cs}_{0.25}\text{FA}_{0.75}\text{Sn}_{0.5}\text{Pb}_{0.5}\text{I}_3$  films deposited on PEDOT: PSS (black line), 2PACz (red line), and Br-2PACz (blue line). Here,

the active layers was deposited with a reduced thickness (340 nm) in order to prevent the photodetectors' saturation.

(a)

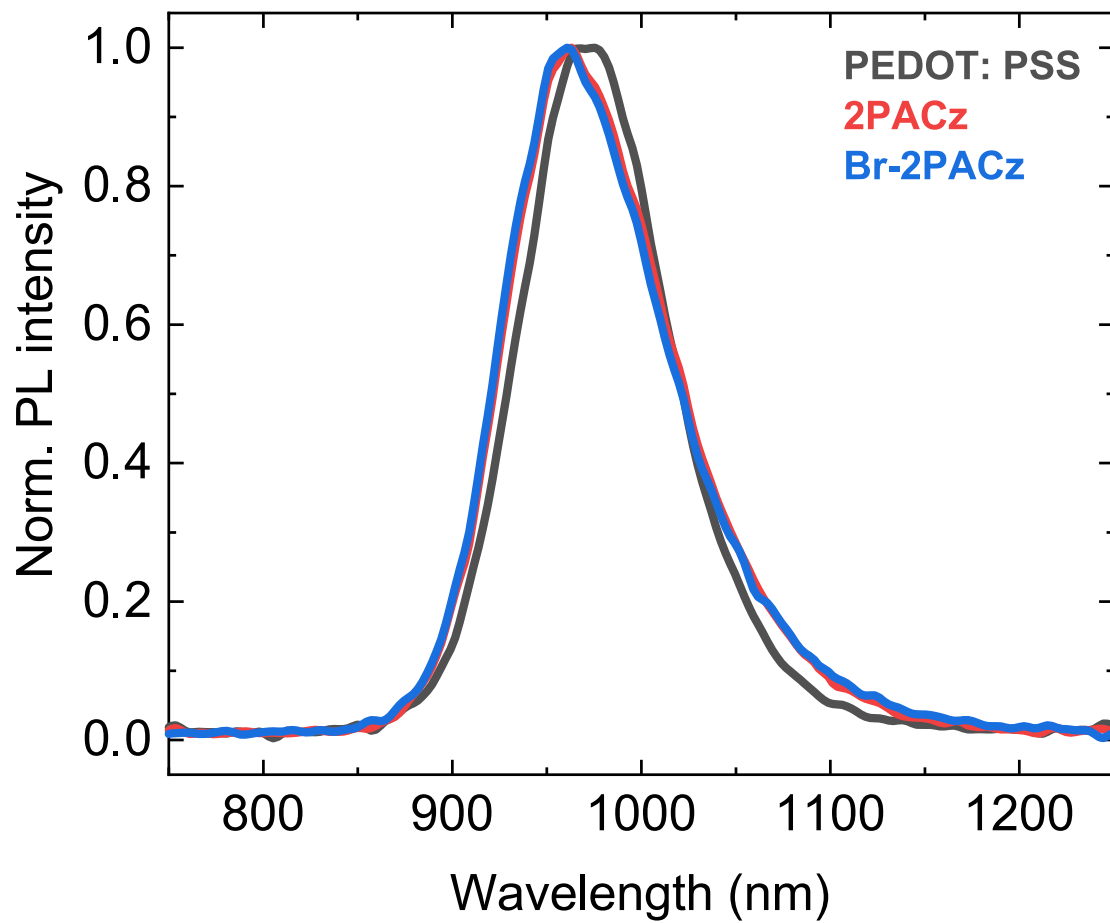

**Figure S10.** a) Normalized photoluminescence (PL) peaks of the perovskite deposited on PEDOT: PSS (black line), 2PACz (red line), and Br-2PACz (blue line).

**Table S3.** Average parameter value for the solar cell devices. The values in parenthesis are related to the champion devices.

| Device           | Jsc<br>(mA cm <sup>-2</sup> ) | Voc<br>(V)                    | FF                            | PCE (%)                       |
|------------------|-------------------------------|-------------------------------|-------------------------------|-------------------------------|
| <b>PEDOT:PSS</b> | 29.34 ± 0.70 ( <b>30.16</b> ) | 0.747 ± 0.02 ( <b>0.762</b> ) | 71.35 ± 1.72 ( <b>71.05</b> ) | 15.62 ± 0.57 ( <b>16.33</b> ) |
| <b>2PACz</b>     | 31.33 ± 0.40 ( <b>31.11</b> ) | 0.792 ± 0.01 ( <b>0.803</b> ) | 73.83 ± 0.57 ( <b>73.81</b> ) | 18.13 ± 0.29 ( <b>18.44</b> ) |
| <b>Br-2PACz</b>  | 32.29 ± 0.31 ( <b>32.14</b> ) | 0.793 ± 0.01 ( <b>0.810</b> ) | 75.2 ± 0.82 ( <b>74.94</b> )  | 19.09 ± 0.35 ( <b>19.51</b> ) |

(a)

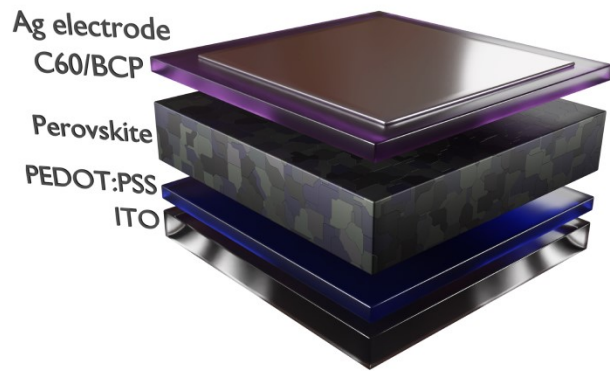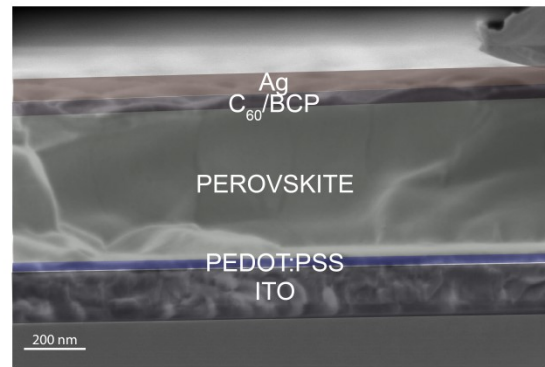

(b)

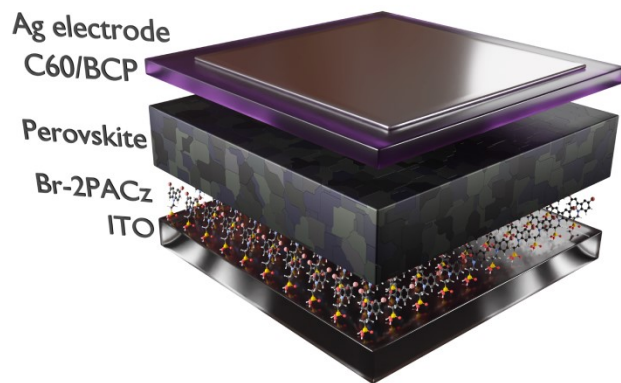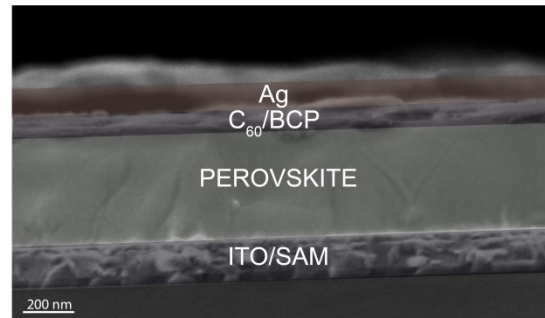

**Figure S11.** Schematic representation of the device structure on the left, and SEM cross-section image on the right for a) PEDOT: PSS- and b) SAMs- based solar cells.



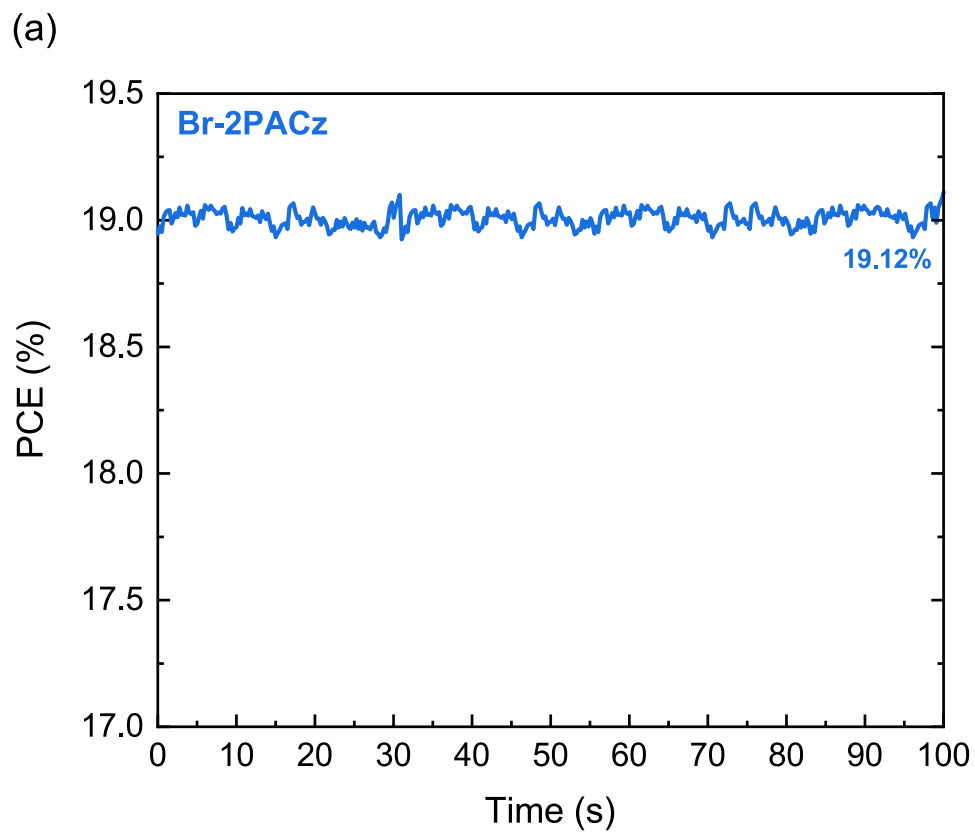

**Figure S12.** Steady-state power output measured with a constant bias of 0.670 V of the best devices fabricated with Br-2PACz as HTL.

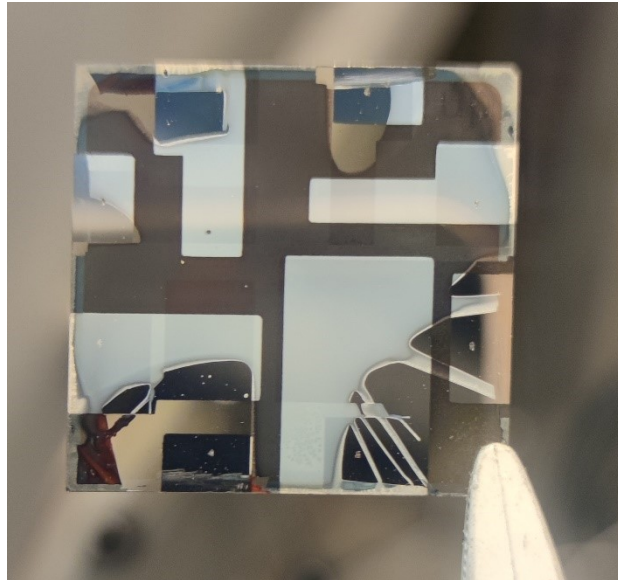

**Figure S13.** Picture of a solar cells fabricated using Br-2PACz as HTL, without forcing the perovskite solution spreading.

**Table S4.** Photovoltaic parameters of devices fabricated using 2PACz as HTL without spreading the perovskite solution (reverse measurement).

| Device | Jsc (mA/cm <sup>2</sup> ) | Voc (V) | FF   | PCE (%) |
|--------|---------------------------|---------|------|---------|
| 1      | 0.018                     | 4.14    | 0.24 | 0.02    |
| 2      | 0.177                     | 13.40   | 0.27 | 0.65    |
| 3      | 0.006                     | 1.43    | 0.00 | 0.00    |
| 4      | 0.120                     | 9.59    | 0.25 | 0.29    |
| 5      | 0.781                     | 31.51   | 0.76 | 18.36   |
| 6      | 0.090                     | 17.10   | 0.25 | 0.38    |
| 7      | 0.012                     | 2.40    | 0.13 | 0.00    |
| 8      | 0.046                     | 4.98    | 0.25 | 0.06    |
| 9      | 0.800                     | 30.98   | 0.73 | 18.14   |
| 10     | 0.770                     | 31.85   | 0.72 | 17.66   |

(a)

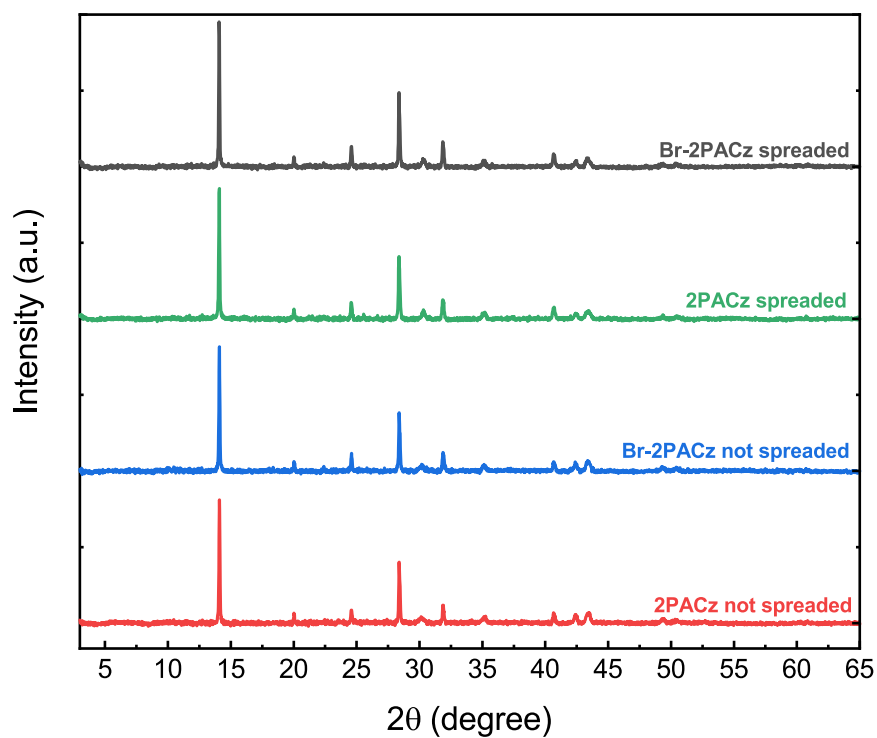

**Figure S14.** a) XRD spectra for the perovskite deposited on 2PACz and Br-2PACz without forcing the solution spreading (red and blue line, respectively), and for the active layer deposited on 2PACz and Br-2PACz forcing the solution spreading (green and black lines, respectively).

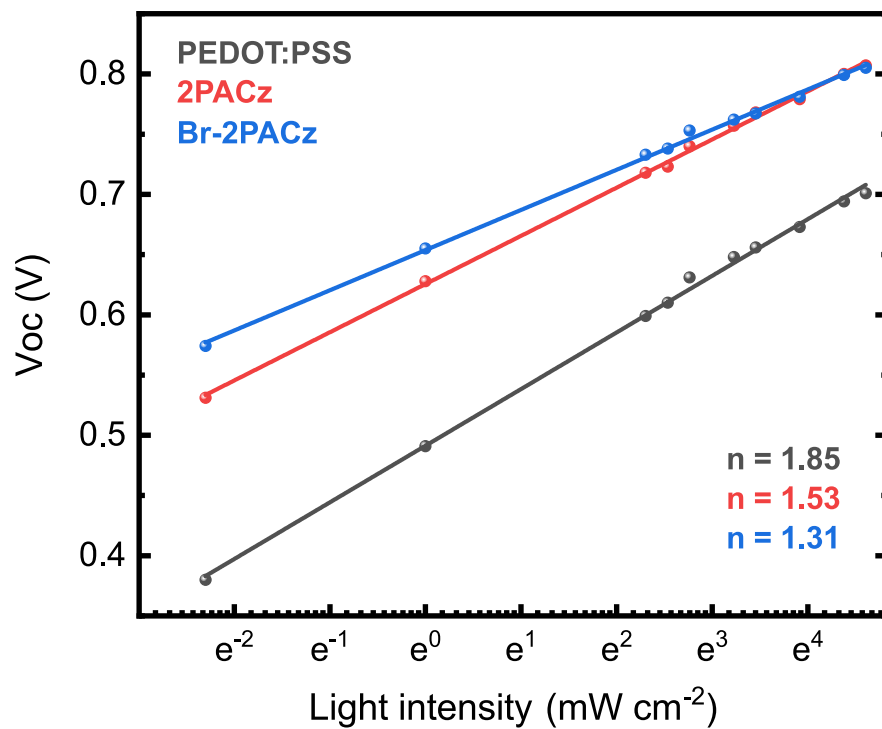

**Figure S15.** a)  $V_{OC}$  versus light intensity plot for solar cells fabricated using PEDOT: PSS (black curve), 2PACz (red curve), and Br-2PACz (blue curve). On the graph are reported the ideality factor for the three different devices.

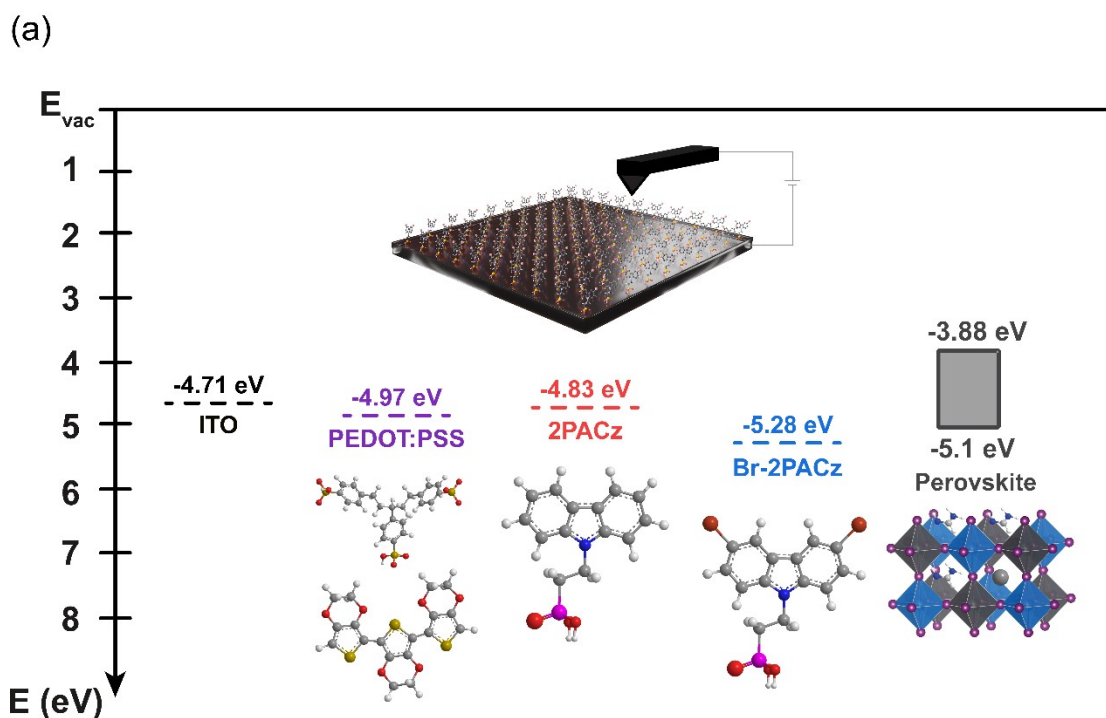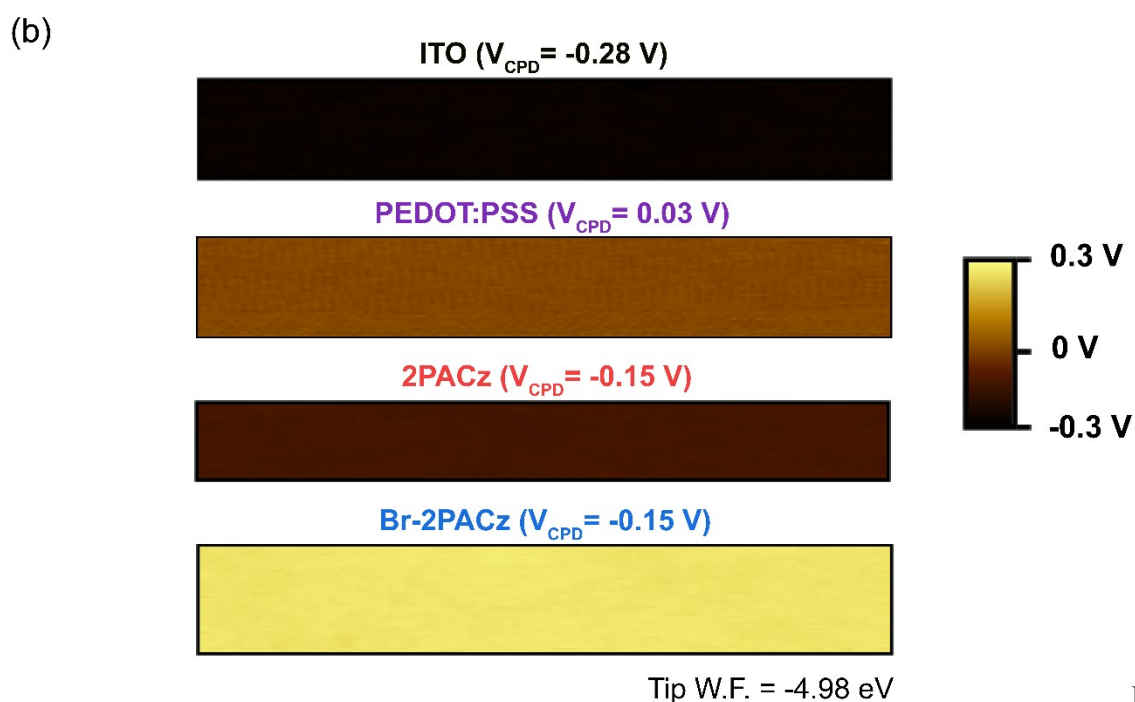

**e S16.** a) Band alignment diagram reporting the WF values for ITO, ITO/PEDOT: PSS, ITO/2PACz, and ITO/Br-2PACz electrodes. In the figure are also reported the valence and conduction band values of the perovskite layer taken from reference <sup>1</sup>. b) KPFM images showing the surface potential profile of ITO, ITO/PEDOT: PSS, ITO/2PACz, and ITO/Br-2PACz electrodes. On the figure, we provided the tip WF measured using a freshly cleaved highly ordered pyrolytic graphite (HOPG) whose work function is 4.6 eV. Finally, in parenthesis it has been reported the contact potential difference for the three different samples.

**Figur**



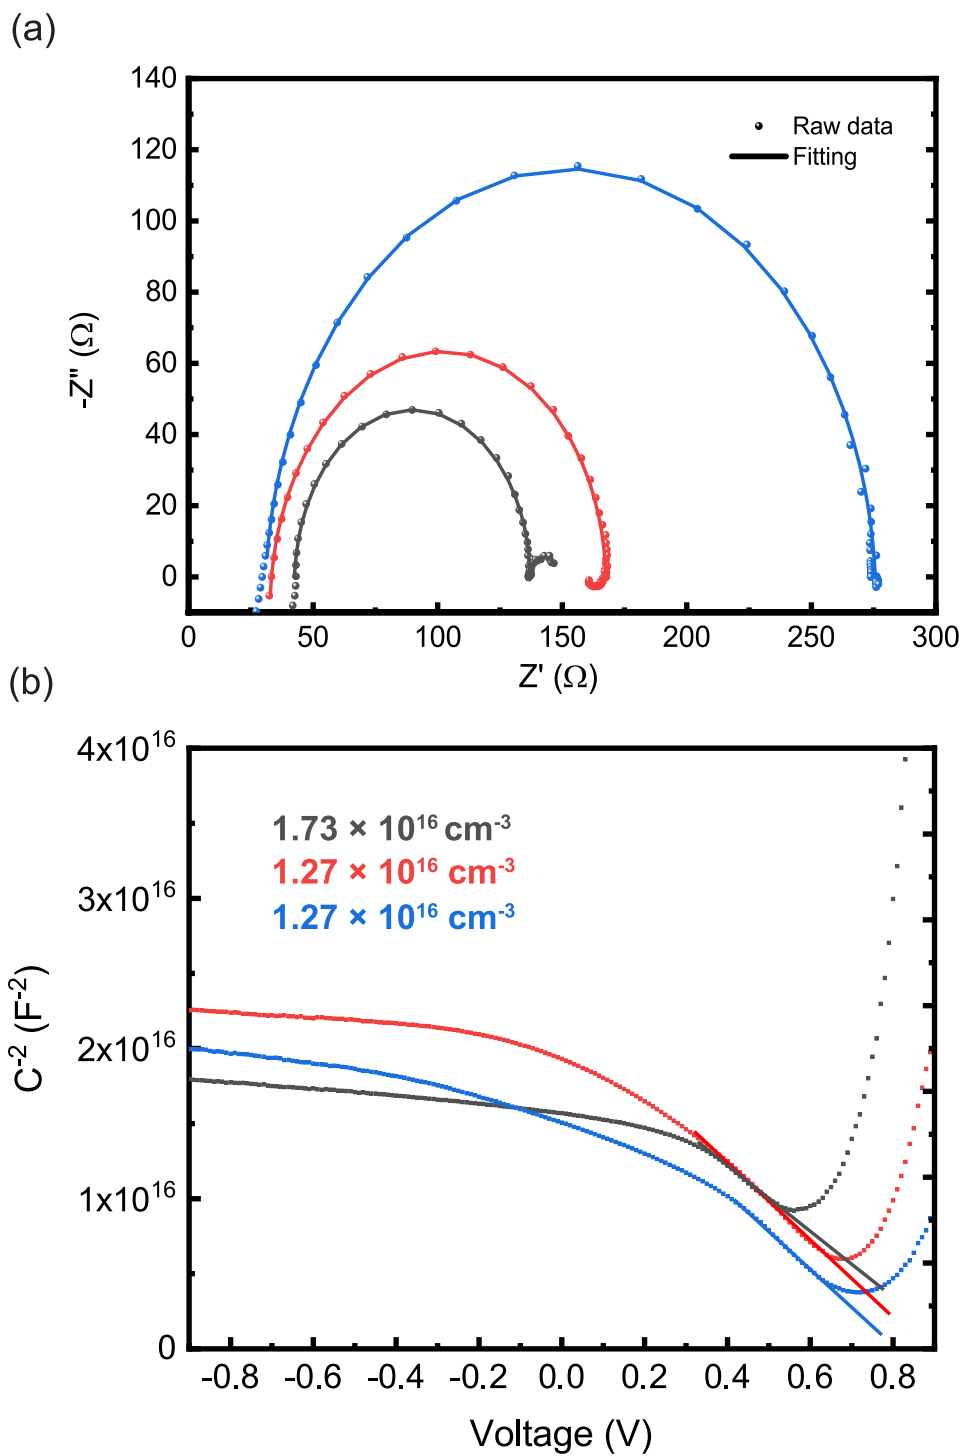

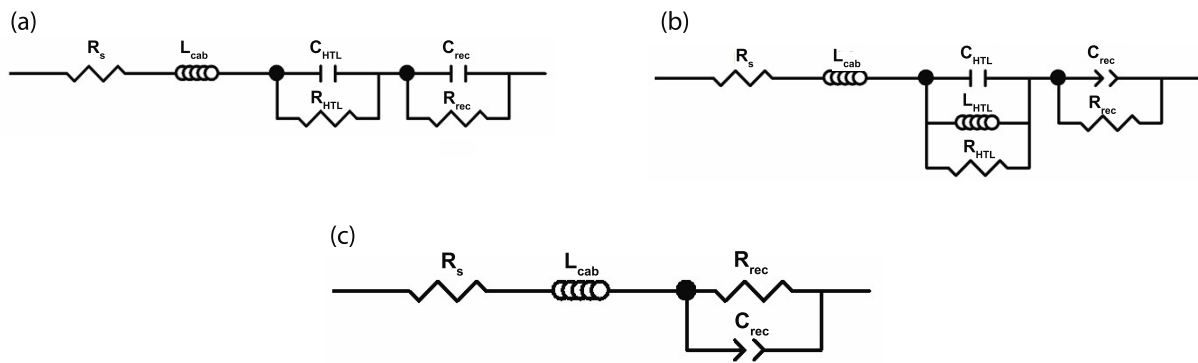

**Figure S18.** Equivalent circuit used to fit the experimental data for the impedance spectroscopy performed for the solar cells fabricated with a) PEDOT: PSS, b) 2PACz, and c) Br-2PACz as HTL.

**Table S5.** Series resistance, perovskite/HTL interface resistance, and recombination resistance values for PEDOT: PSS, 2PACz, and Br-2PACz based devices. The values in parenthesis represent the error values for the fitting process.

|                        | PEDOT: PSS    | 2PACz         | Br-2PACz      |
|------------------------|---------------|---------------|---------------|
| $R_S$ ( $\Omega$ )     | 41.89 (0.16%) | 31.58 (0.35%) | 30.64 (0.27%) |
| $R_{HTL}$ ( $\Omega$ ) | 11.16 (2.76%) | 6.58 (3.12%)  |               |
| $R_{rec}$ ( $\Omega$ ) | 95.05 (0.1%)  | 129.3 (0.18%) | 245 (0.08%)   |

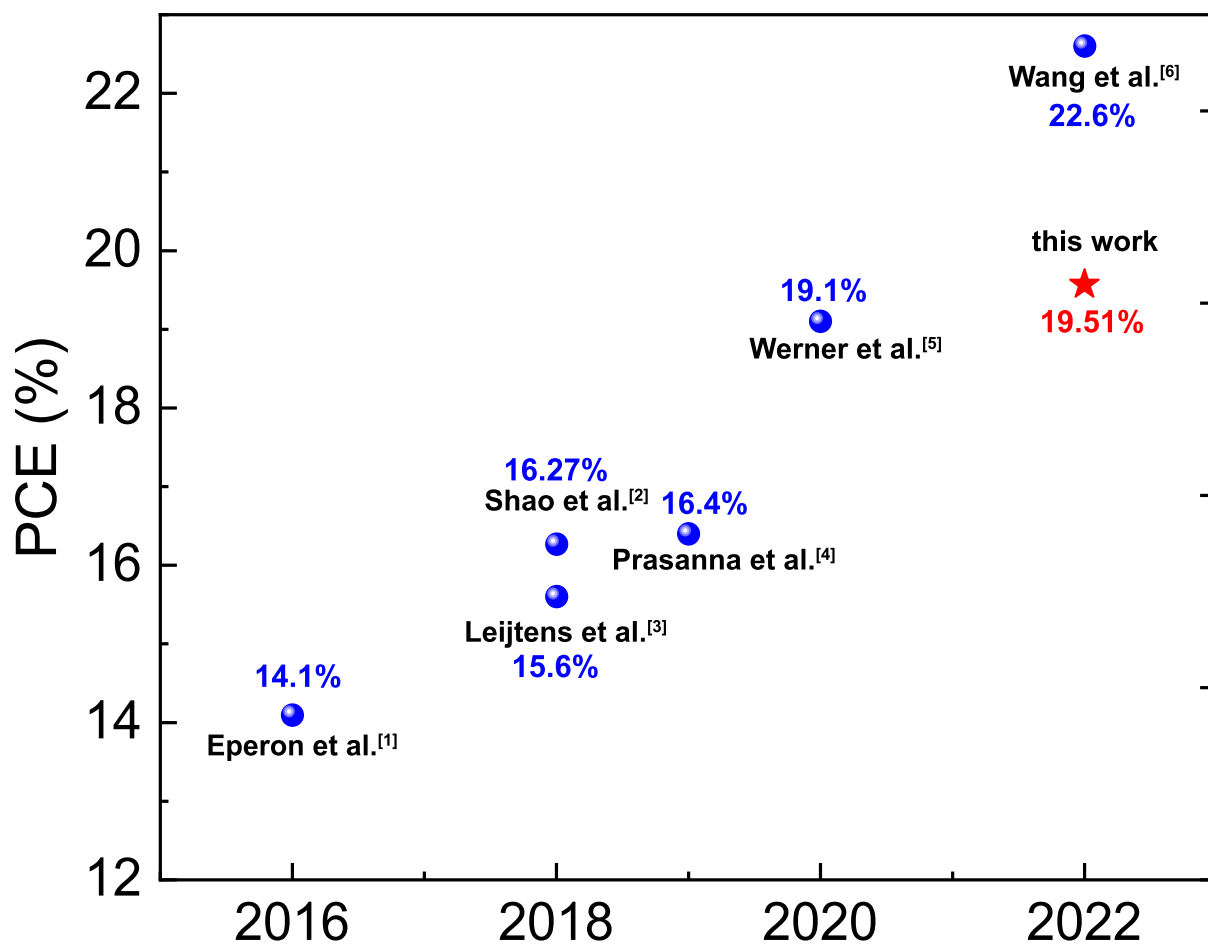

**Figure S19.** Record chart for the device efficiency of  $\text{Cs}_{0.25}\text{FA}_{0.75}\text{Sn}_{0.5}\text{Pb}_{0.5}\text{I}_3$  perovskite solar cells without any anti-reflective coating.<sup>1-6</sup>

- 1 G. E. Eperon, T. Leijtens, K. A. Bush, R. Prasanna, T. Green, J. T. Wang, D. P. Mcmeekin, G. Volonakis, R. L. Milot, R. May, A. Palmstrom, J. Daniel, R. A. Belisle, J. B. Patel, E. S. Parrott, R. J. Sutton, W. Ma, B. Conings, A. Babayigit, H. Boyen, S. Bent, F. Giustino, M. Herz, M. B. Johnston, M. D. McGehee and H. J. Snaith, *Science*, 2016, **354**, 861-865.
- 2 S. Shao, Y. Cui, H. Duim, X. Qiu, J. Dong, G. H. Brink, G. Portale, R. C. Chiechi, S. Zhang, J. Hou and M. A. Loi, *Adv. Mater.*, 2018, **30**, 1803703.
- 3 T. Leijtens, R. Prasanna, K. A. Bush, G. E. Eperon, J. A. Raiford, A. Gold-Parker, E. J. Wolf, S. A. Swifter, C. C. Boyd, H. P. Wang, M. F. Toney, S. F. Bent and M. D. McGehee, *Sustain. Energy Fuels*, 2018, **2**, 2450–2459.
- 4 R. Prasanna, T. Leijtens, S. P. Dunfield, J. A. Raiford, E. J. Wolf, S. A. Swifter, J. Werner, G. E. Eperon, C. de Paula, A. F. Palmstrom, C. C. Boyd, M. F. A. M. van Hest, S. F. Bent, G. Teeter, J. J. Berry and M. D. McGehee, *Nat. Energy*, 2019, **4**, 939–947.
- 5 J. Werner, T. Moot, T. A. Gossett, I. E. Gould, A. F. Palmstrom, E. J. Wolf, C. C. Boyd, M. F. A. M. Van Hest, J. M. Luther, J. J. Berry and M. D. McGehee, *ACS Energy Lett.*, 2020, **5**, 1215–1223.
- 6 J. Wang, Z. Yu, D. D. Astridge, Z. Ni, L. Zhao, B. Chen, M. Wang, Y. Zhou, G. Yang, X. Dai, A. Sellinger and J. Huang, *ACS Energy Lett.*, 2022, **7**, 3353–3361.
